# Supplementary material
Source: MDPI journal article supplement (https://www.mdpi.com/2311-553X/5/1/3)
Supplement: s1 [file s1]

**Table 1: List of primers used for qPCR**

| Gene                      | Primer sequence          |
|---------------------------|--------------------------|
| <i>BMP5</i> forward       | CCGGATATACAAAGACCGCAGCAA |
| <i>BMP5</i> reverse       | TTCTCGCGTCTAACAGCAACAGG  |
| <i>Inc-BMP5</i> forward   | AAGACCTGCGTGAGACAGTAGAG  |
| <i>Inc-BMP5</i> reverse   | TGTGAGCCTAGCACTCCATAAACA |
| <i>ZBTB16</i> forward     | CTGCACTATGGACGGGAAGAGA   |
| <i>ZBTB16</i> reverse     | GGGAAGGACAGAGTAGATGCCC   |
| <i>Inc-ZBTB16</i> forward | TGAAGGAAAGAGGGAGAGGAGAG  |
| <i>Inc-ZBTB16</i> reverse | GGGCTGTGAGGGTAAAGAGAGG   |
| <i>RSPO4</i> forward      | TCCTGCTCACACTGCTGCTATTC  |
| <i>RSPO4</i> reverse      | GCCCGACTCCCACTTGTTTCTT   |
| <i>Inc-RSPO4</i> forward  | TCTCCTGCTCCTTTGTCCCGAA   |
| <i>Inc-RSPO4</i> reverse  | ATCCCTCTCTGCTCCCTATGCC   |
