# Supplementary material
Source: MDPI journal article supplement (https://www.mdpi.com/2311-553X/5/1/3)

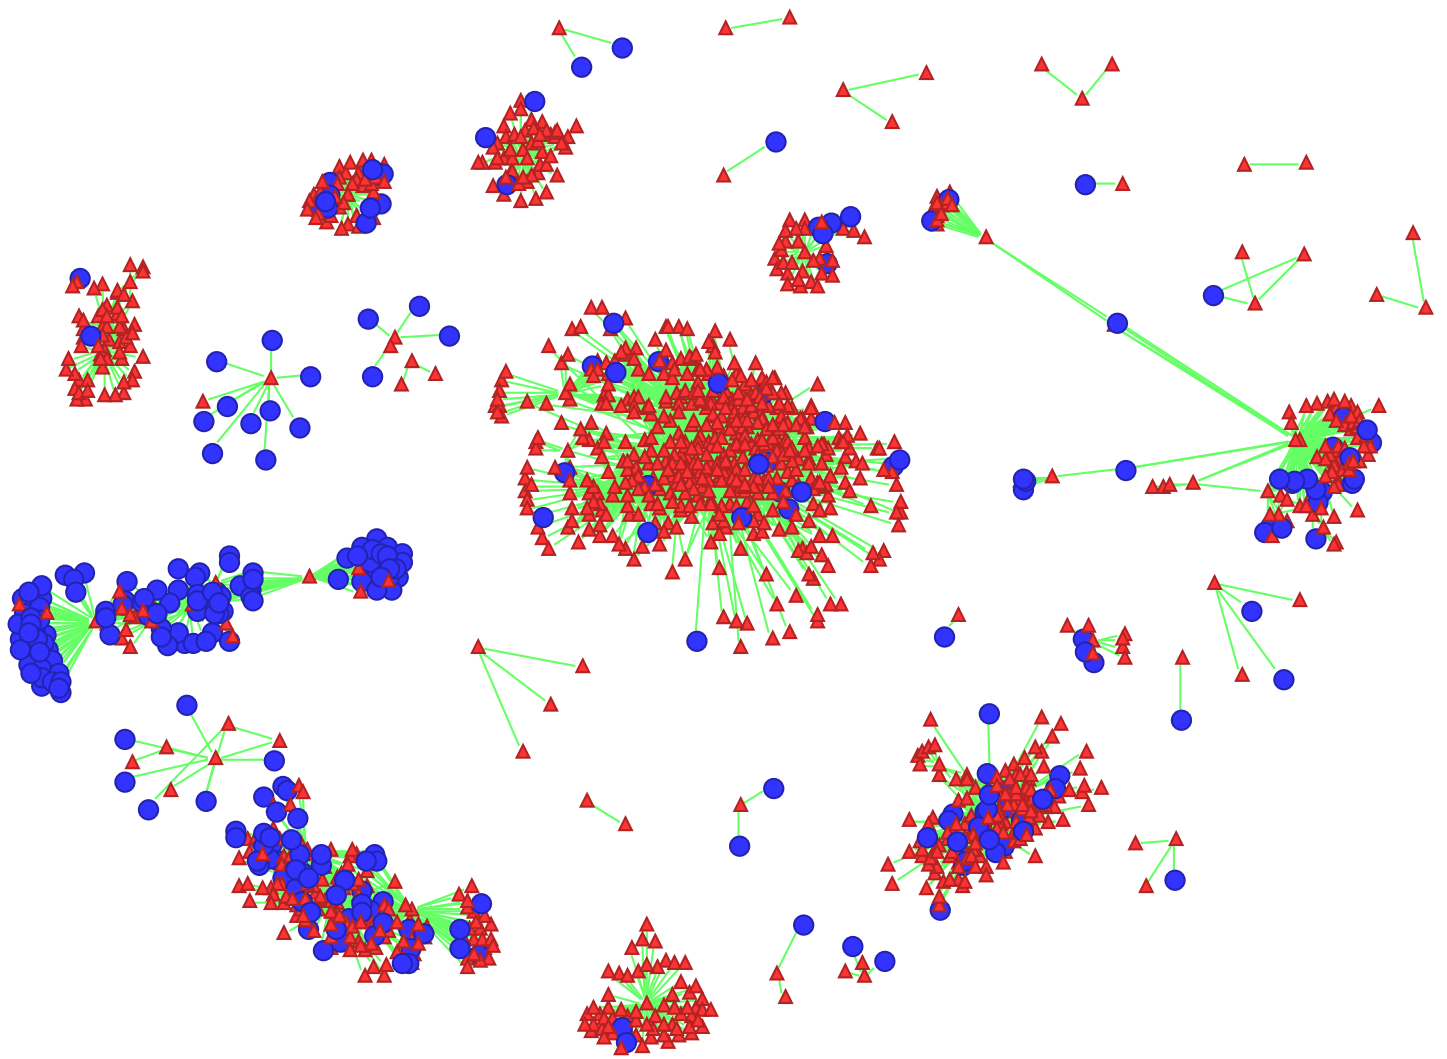

● coding gene  
▲ lncRNA

Supplement: s1 [file s1]

***BMP5* neighbouring *lncRNA***

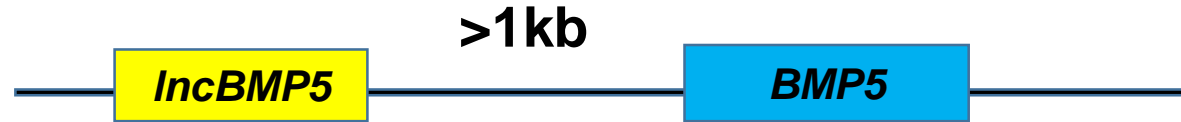

***ZBTB16* neighbouring *lncRNA***

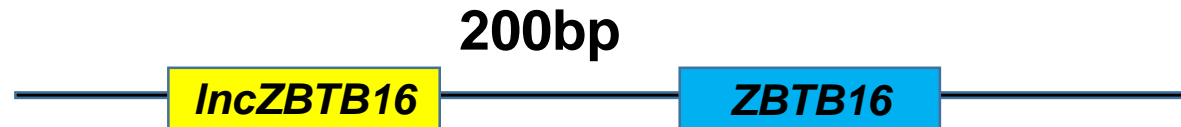

***RSPO4* neighbouring *lncRNA***

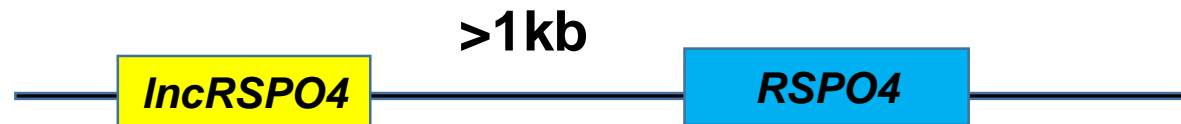

Supplement: s1 [file s1]
